# Supplementary material
Source: PubMed Central journal article supplement (PMC9751087)
Supplement: 41467_2022_35456_MOESM1_ESM.pdf [file 41467_2022_35456_MOESM1_ESM.pdf]

# Primary exposure to SARS-CoV-2 variants elicits convergent epitope specificities, immunoglobulin V gene usage and public B cell clones

Noemia S. Lima<sup>1\*</sup>, Maryam Musayev<sup>1\*</sup>, Timothy S. Johnston<sup>1\*</sup>, Danielle A. Wagner<sup>1\*</sup>, Amy R. Henry<sup>1</sup>, Lingshu Wang<sup>1</sup>, Eun Sung Yang<sup>1</sup>, Yi Zhang<sup>1</sup>, Kevina Birungi<sup>1</sup>, Walker P. Black<sup>1</sup>, Sijy O'Dell<sup>1</sup>, Stephen D. Schmidt<sup>1</sup>, Damee Moon<sup>1</sup>, Cynthia G. Lorang<sup>1</sup>, Bingchun Zhao<sup>1</sup>, Man Chen<sup>1</sup>, Kristin L. Boswell<sup>1</sup>, Jesmine Roberts-Torres<sup>1</sup>, Rachel L. Davis<sup>1</sup>, Lowrey Peyton<sup>1</sup>, Sandeep R. Narpala<sup>1</sup>, Sarah O'Connell<sup>1</sup>, Leonid Serebryanny<sup>1</sup>, Jennifer Wang<sup>1</sup>, Alexander Schragger<sup>1</sup>, Chloe Adrienna Talana<sup>1</sup>, Geoffrey Shimberg<sup>1</sup>, Kwanyee Leung<sup>1</sup>, Wei Shi<sup>1</sup>, Rawan Khashab<sup>2</sup>, Asaf Biber<sup>2,3</sup>, Tal Zilberman<sup>2,3</sup>, Joshua Rhein<sup>4</sup>, Sara Vetter<sup>5</sup>, Afeefa Ahmed<sup>4</sup>, Laura Novik<sup>1</sup>, Alicia Widge<sup>1</sup>, Ingelise Gordon<sup>1</sup>, Mercy Guech<sup>1</sup>, I-Ting Teng<sup>1</sup>, Emily Phung<sup>1</sup>, Tracy J. Ruckwardt<sup>1</sup>, Amarendra Pegu<sup>1</sup>, John Misasi<sup>1</sup>, Nicole A. Doria-Rose<sup>1</sup>, Martin Gaudinski<sup>1</sup>, Richard A. Koup<sup>1</sup>, Peter D. Kwong<sup>1</sup>, Adrian B. McDermott<sup>1</sup>, Sharon Amit<sup>6</sup>, Timothy W. Schacker<sup>4</sup>, Itzchak Levy<sup>2,3</sup>, John R. Mascola<sup>1</sup>, Nancy J. Sullivan<sup>1</sup>, Chaim A. Schramm<sup>1#</sup>, Daniel C. Douek<sup>1#</sup>

1. Vaccine Research Center, National Institute of Allergy and Infectious Diseases, National Institutes of Health. Bethesda, MD 20892, USA.

2. Infectious Disease Unit, Sheba Medical Center, Ramat Gan 5262112, Israel.

3. Sackler Medical School, Tel Aviv University, Tel Aviv 6997801, Israel.

4. Department of Medicine, University of Minnesota Medical School, Minneapolis, MN 55455, USA.

5. Minnesota Department of Health, St Paul, MN 55164, USA

6. Clinical Microbiology, Sheba Medical Center, Ramat-Gan 5262112, Israel.

\*equal contribution

#correspondence to [chaim.schramm@nih.gov](mailto:chaim.schramm@nih.gov) and [ddouek@nih.gov](mailto:ddouek@nih.gov)

## Table of Contents

### 1. Supplementary Figures

|                                                                                                   |   |
|---------------------------------------------------------------------------------------------------|---|
| Figure S1: Additional serology and epitope mapping data .....                                     | 2 |
| Figure S2: Gating strategy to assess T cell responses .....                                       | 3 |
| Figure S3: Rapid assembly, transfection and production of immunoglobulin (RATP-Ig) workflow ..... | 4 |
| Figure S4: Antigen-specific B cell sorting.....                                                   | 5 |
| Figure S5: Validation of RATP-Ig screening with synthesized plasmids.....                         | 6 |
| Figure S6: Clonal expansion in each individual.....                                               | 7 |
| Figure S7: SARS-CoV-2-specific light chain V gene usage frequencies .....                         | 8 |

### 2. Supplementary Tables

|                                                               |    |
|---------------------------------------------------------------|----|
| Table S1: Details of the study cohort .....                   | 9  |
| Table S2: Sample recovery from 10x Genomics.....              | 10 |
| Table S3: Significant differences in gene-usage .....         | 11 |
| Table S4: Antibodies information.....                         | 12 |
| Table S5: Primer sequences for RATP-Ig and Ig sequencing..... | 13 |

A

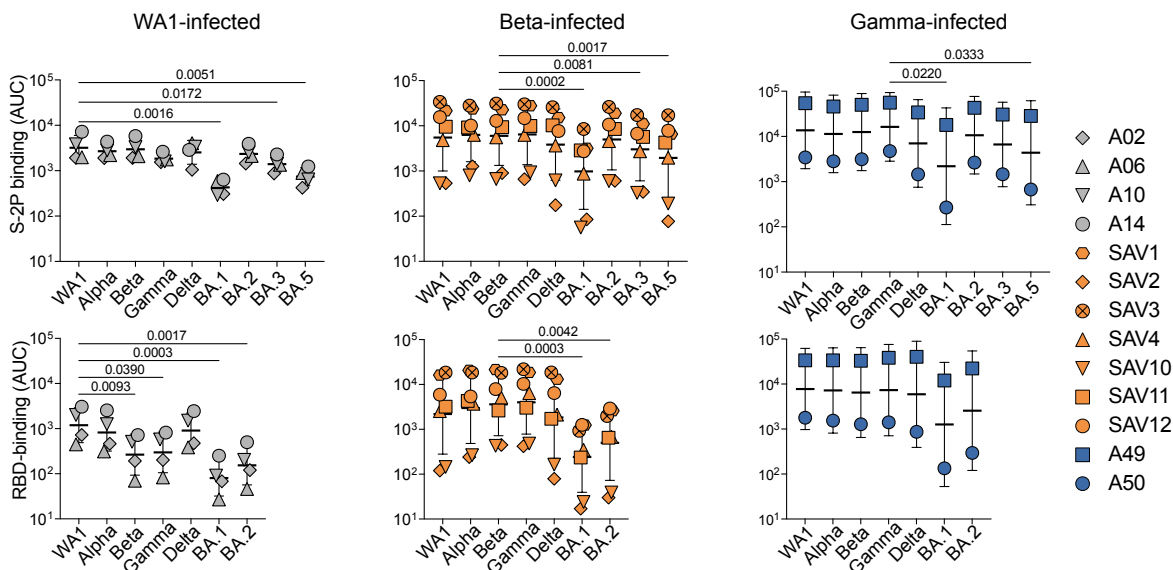

B

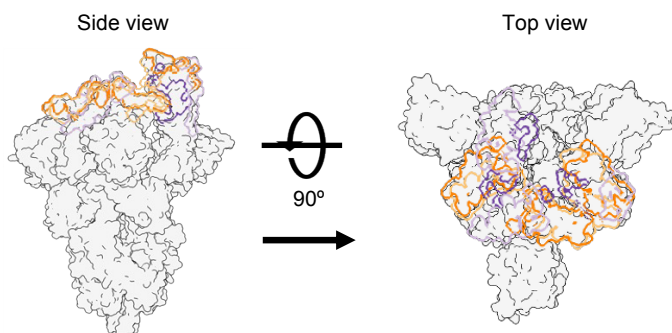

| Site | mAb       | Barnes classification | Disrupted epitope on variant spike |
|------|-----------|-----------------------|------------------------------------|
| A    | B1-182    | CLASS I               | Beta and Gamma                     |
| B    | CB6       |                       |                                    |
| C    | A20-29.1  | CLASS II              | Delta<br>Gamma                     |
| D    | A19-46.1  |                       |                                    |
| E    | LY-COV555 | CLASS III             | Delta<br>Beta and Delta            |
| F    | A19-61.1  |                       |                                    |
| G    | S309      | CLASS IV              | Gamma and Delta                    |
| H    | A23-97.1  |                       |                                    |
| I    | A19-30.1  |                       |                                    |
| J    | A23-80.1  |                       |                                    |
| K    | CR3022    |                       |                                    |

C

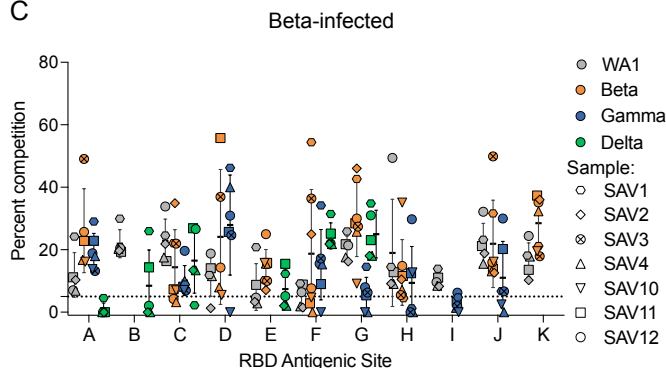

D

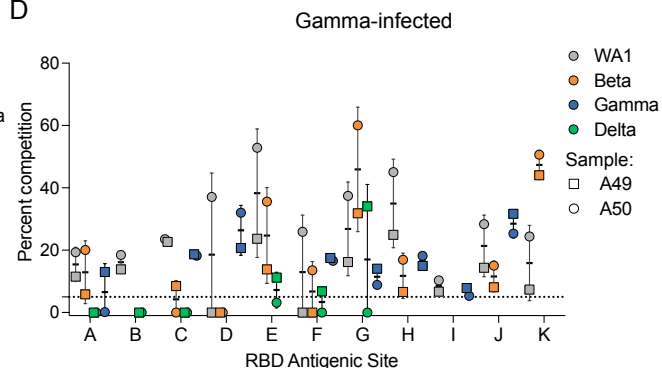

**Supplementary Fig. 1:** Additional serology and epitope mapping data. **(A)** Binding antibody titers to S-2P spike (top panels) and RBD (bottom panels) from different variants indicated on the x-axis. Symbol shapes indicate each donor as shown on the right (more information about the donors on Supplementary Table 1). Bars indicate geometric means with geometric standard deviations. Statistical significance was determined by Friedman test with a two-step linear step-up procedure of Benjamini, Krieger and Yekutieli. **(B)** Structural schematic of spike protein showing epitopes from monoclonal antibodies used for RBD epitope mapping by competition assay. **(C)** Epitope mapping of Beta-infected individuals on WA1, Beta, Gamma and Delta spike proteins. Competition cannot be measured for disrupted epitopes indicated on panel B, and therefore symbols are missing at these sites. Bars indicate means with standard deviations. Measurements for each individual were performed in duplicate and averaged; **(D)** Epitope mapping of Gamma-infected individuals on WA1, Beta, Gamma and Delta spike proteins. Competition cannot be measured for disrupted epitopes indicated on panel B, and therefore symbols are missing at these sites. Bars indicate means with standard deviations.

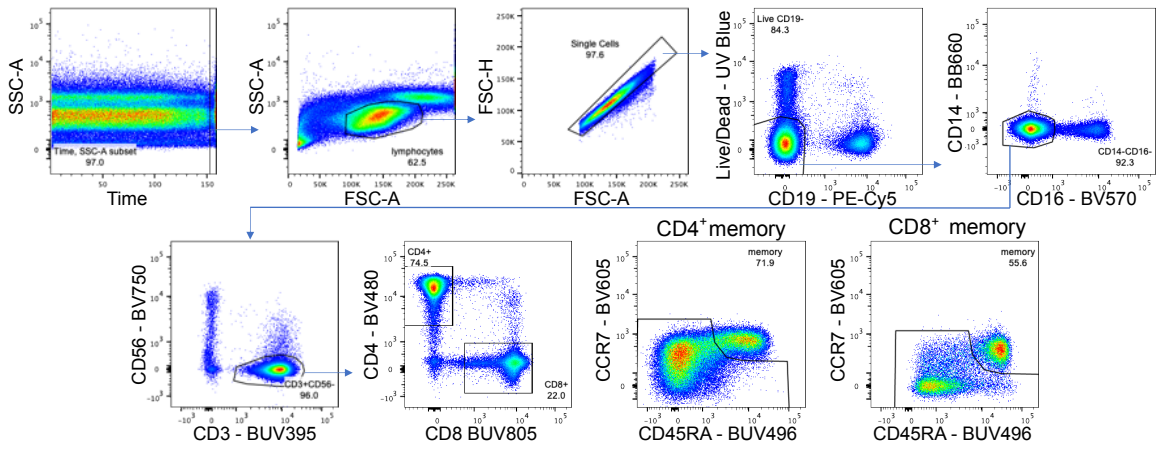

**Supplementary Fig. 2:** Gating strategy to assess T cell responses by flow cytometry from CD4<sup>+</sup> and CD8<sup>+</sup> T cell memory populations.

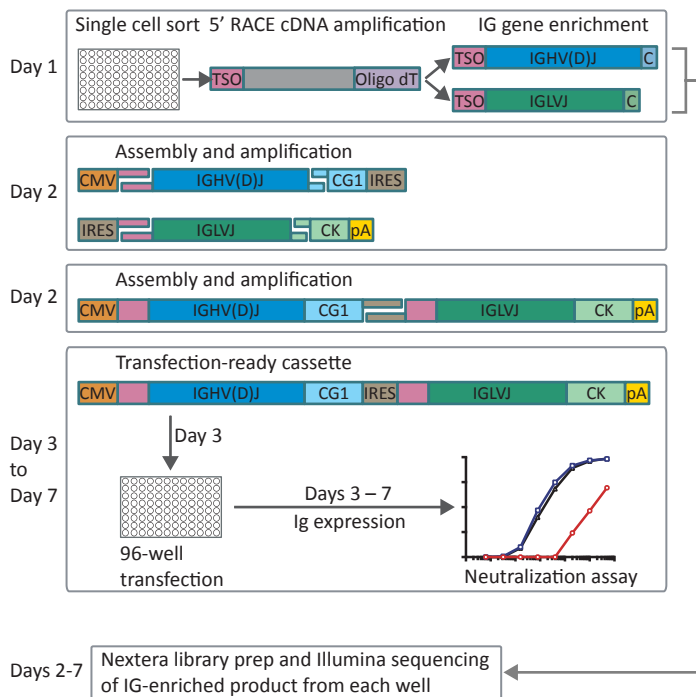

**Supplementary Fig. 3:** Rapid assembly, transfection and production of immunoglobulin (RATP-Ig) workflow. 5'-RACE is used to generate total cDNA. Full-length heavy and light chain immunoglobulin V genes are enriched by PCR and assembled into recombinant mAb linear expression cassettes. In parallel, V gene libraries are synthesized and sequenced by NGS. Final cassettes are transfected into 96-well Expi293 microtiter cultures, and culture supernatants are collected up to 7 days after initial sort for functional screening.

A

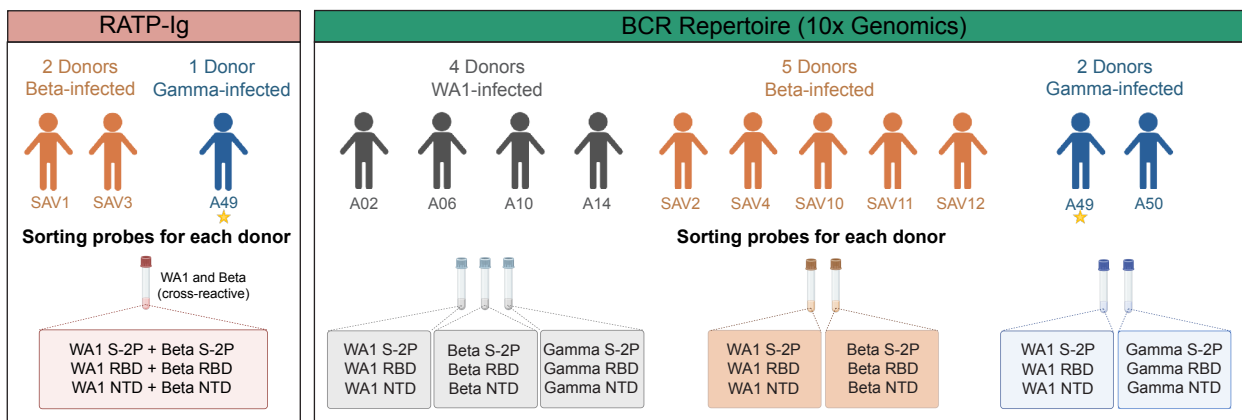

B

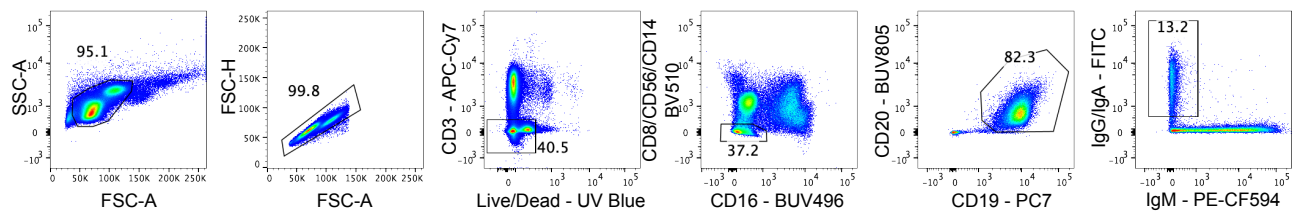

C

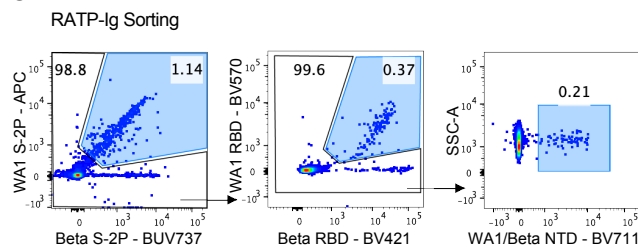

D

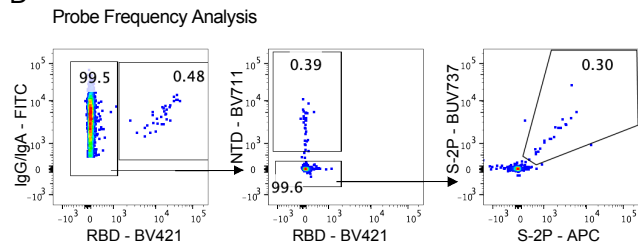

E

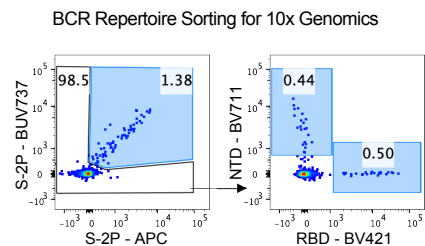

**Supplementary Fig. 4: Antigen-specific B cell sorting.** (A) Schematic showing infection history and sorting strategy for each sequencing approach (RATP-Ig or BCR repertoire by 10x Genomics). The individual marked with a star was used for both RATP-Ig and total BCR repertoire sequencing. (B) Flow cytometry representative plots and gating strategy for class-switched memory B cells. (C)-(E) Representative plots and gating strategy for sorting and analysis of antigen-specific cells for (C) RATP-Ig, (D) Frequency analysis, and (E) Repertoire sequencing. Final sort gates are shown in blue.

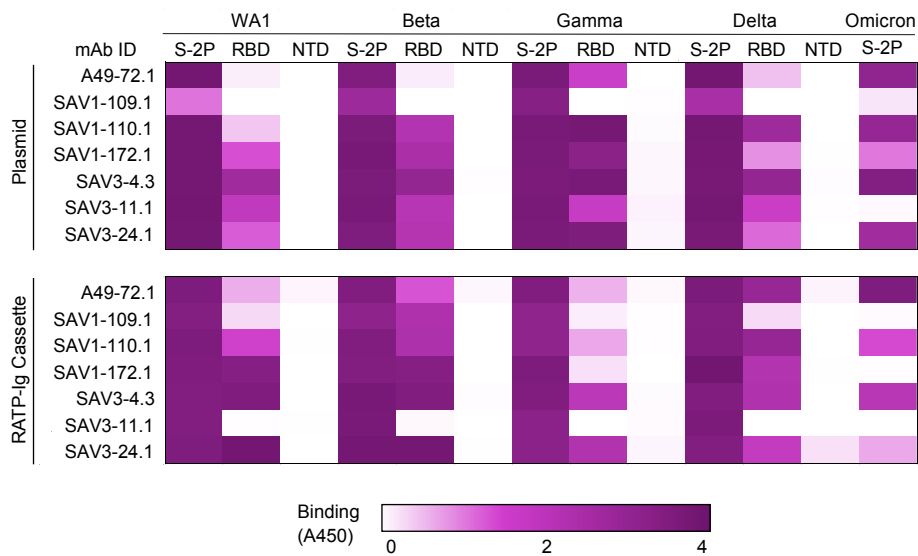

**Supplementary Fig. 5:** Validation of RATP-Ig screening with synthesized plasmids. Heatmaps show ELISA absorbance at 450 nm (not quantitative).

WA1-infected

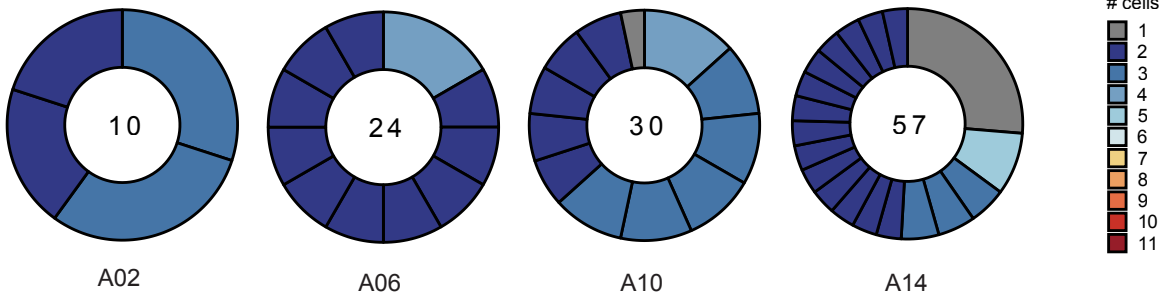

Beta-infected

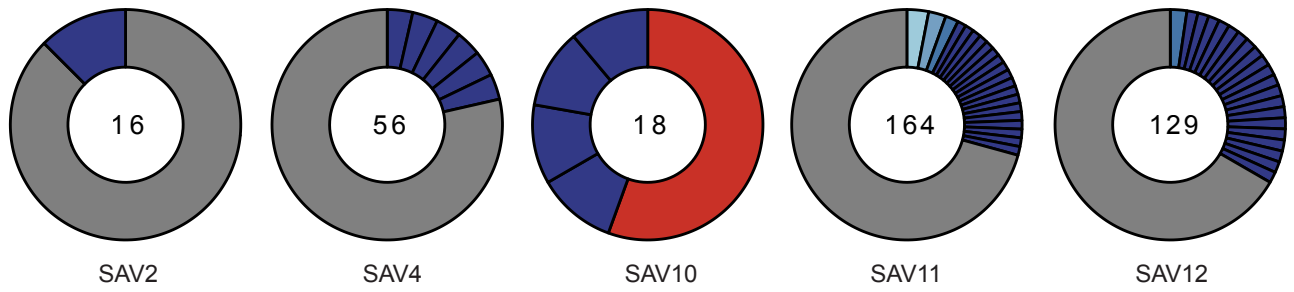

Gamma-infected

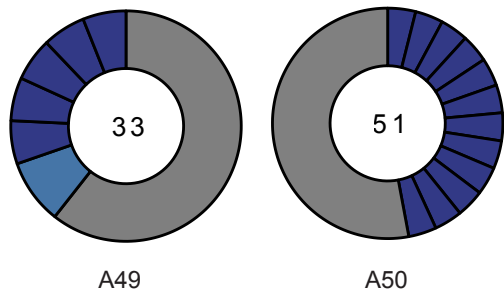

**Supplementary Fig. 6:** Clonal expansion in each individual obtained by BCR repertoire sequencing by 10x Genomics method. Expanded clones are colored by the number of cells in each clone as shown on the right; singleton clones are shown in gray.

A

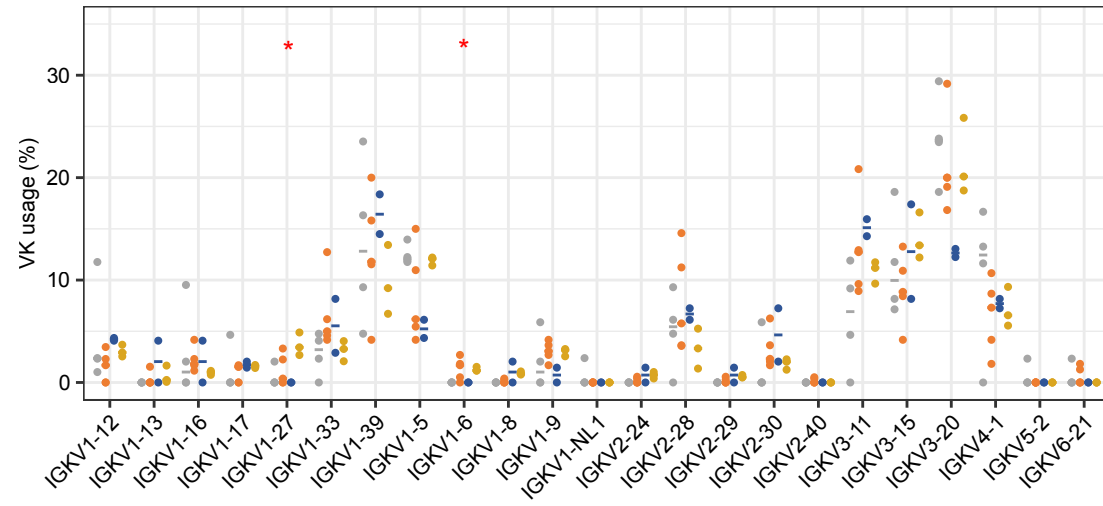

B

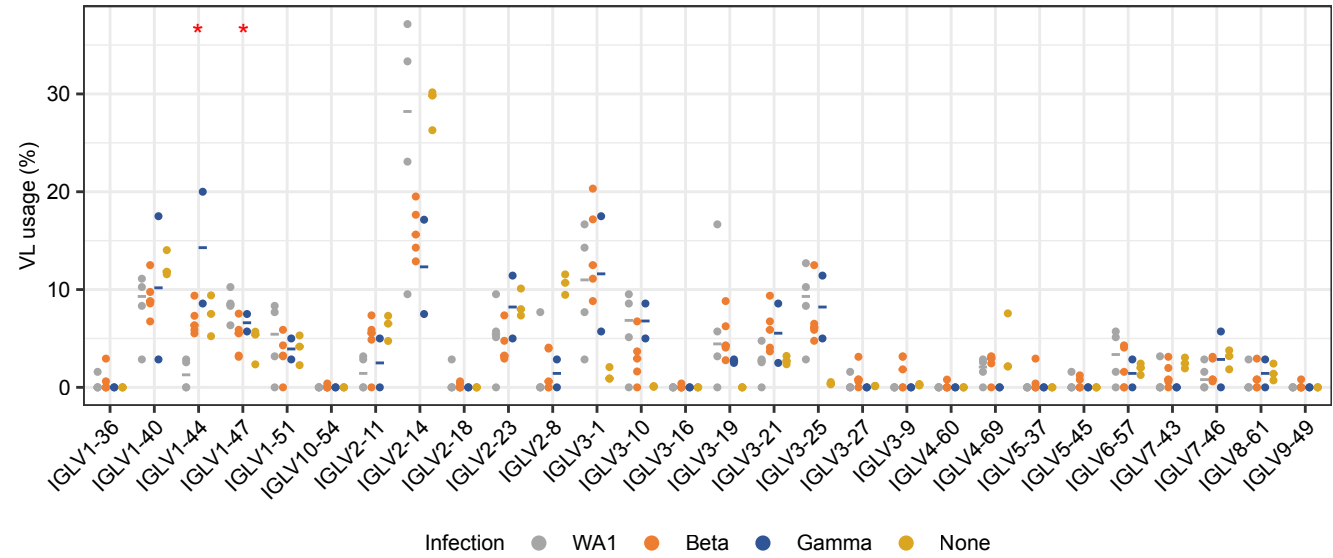

**Supplementary Fig. 7:** SARS-CoV-2-specific light chain V gene usage frequencies. **(A)** Kappa and **(B)** Lambda chain V gene repertoire analysis by infecting variant, with WA1, Beta and Gamma shown in grey, orange and blue, respectively, and data from pre-pandemic controls in yellow. The x-axis shows all germline genes used; the y-axis represents the percent of individual gene usage.  $n=349$ , 1826, 302, and  $\sim 1 \times 10^9$  light chains from 4, 7, 2, and 3 individuals, for WA1-infected, Beta-infected, Gamma-infected, and historical controls, respectively. Stars indicate genes with at least one significant difference between groups; pairwise comparisons using the Dunn test are in Supplementary Table 3.



| <b>Subject ID</b> | <b>Infecting virus</b> | <b>Days after symptoms</b> | <b>Disease severity</b> | <b>Date of collection</b> | <b>Gender</b> | <b>Age</b> |
|-------------------|------------------------|----------------------------|-------------------------|---------------------------|---------------|------------|
| <b>A02</b>        | WA1                    | 28                         | Mild                    | Mar-20                    | Male          | 39         |
| <b>A06</b>        | WA1                    | 34                         | Mild                    | Apr-20                    | Female        | 59         |
| <b>A10</b>        | WA1                    | 33                         | Moderate                | Apr-20                    | Female        | 67         |
| <b>A14</b>        | WA1                    | 34                         | Mild                    | Apr-20                    | Male          | 27         |
| <b>SAV1</b>       | Beta                   | 33                         | Severe                  | Jan-21                    | Male          | 60         |
| <b>SAV2</b>       | Beta                   | 33                         | Mild                    | Jan-21                    | Male          | 35         |
| <b>SAV3</b>       | Beta                   | 30                         | Mild                    | Jan-21                    | Female        | 58         |
| <b>SAV4</b>       | Beta                   | 28                         | Mild                    | Jan-21                    | Female        | 30         |
| <b>SAV10</b>      | Beta                   | 38                         | Mild                    | Feb-21                    | Female        | 43         |
| <b>SAV11</b>      | Beta                   | 37                         | Mild                    | Feb-21                    | Female        | 52         |
| <b>SAV12</b>      | Beta                   | 35                         | Mild                    | Feb-21                    | Male          | 44         |
| <b>A49</b>        | Gamma                  | 24                         | Moderate                | Jan-21                    | Female        | 53         |
| <b>A50</b>        | Gamma                  | 17                         | Mild                    | Jan-21                    | Male          | 32         |

**Supplementary Table 1:** Details of the study cohort.

SARS-CoV-2 Probe:

|                                  |       | WA1    |       | Beta     |       | Gamma  |       | Total paired sequences by subject: |
|----------------------------------|-------|--------|-------|----------|-------|--------|-------|------------------------------------|
| WA1-infected                     | A02   | 3/23   | (13%) | 3/8      | (28%) | 4/13   | (31%) |                                    |
|                                  | A06   | 11/140 | (8%)  | 4/74     | (5%)  | 9/62   | (15%) | 24                                 |
|                                  | A10   | 9/87   | (10%) | 10/46    | (22%) | 11/34  | (32%) | 30                                 |
|                                  | A14   | 20/205 | (10%) | 14/76    | (18%) | 23/79  | (29%) | 57                                 |
| Beta-Infected                    | SAV2  | 2/104  | (2%)  | 14/214   | (7%)  | N/A    |       | 16                                 |
|                                  | SAV4  | 16/328 | (5%)  | 40/630   | (6%)  | N/A    |       | 56                                 |
|                                  | SAV10 | 6/102  | (6%)  | 12/131   | (9%)  | N/A    |       | 18                                 |
|                                  | SAV11 | 39/645 | (6%)  | 125/2028 | (6%)  | N/A    |       | 164                                |
|                                  | SAV12 | 32/306 | (10%) | 97/1318  | (7%)  | N/A    |       | 129                                |
| Gamma-Infected                   | A49   | 10/129 | (8%)  | N/A      |       | 23/148 | (16%) | 33                                 |
|                                  | A50   | 14/89  | (16%) | N/A      |       | 37/128 | (29%) | 51                                 |
| Total paired sequences by probe: |       | 162    |       | 319      |       | 107    |       |                                    |

**Supplementary Table 2:** Sample recovery from 10x Genomics-based single cell isolation and sequencing.

| Gene              | Enriched Group | Median usage frequency, enriched | Depleted Group | Median usage frequency, enriched | Adjusted P-value |
|-------------------|----------------|----------------------------------|----------------|----------------------------------|------------------|
| <i>IGHV1-18</i>   | Control        | 7.7%                             | Gamma-infected | 0.7%                             | 0.043            |
| <i>IGHV1-18</i>   | Control        | 7.7%                             | WA1-infected   | 0.0%                             | 0.007            |
| <i>IGHV1-46</i>   | WA1-infected   | 7.1%                             | Gamma-infected | 1.7%                             | 0.037            |
| <i>IGHV3-30</i>   | Gamma-infected | 28.8%                            | Control        | 7.2%                             | 0.034            |
| <i>IGHV3-30</i>   | WA1-infected   | 18.1%                            | Control        | 7.2%                             | 0.038            |
| <i>IGHV4-30-2</i> | Control        | 0.8%                             | Beta-infected  | 0.0%                             | 0.016            |
| <i>IGHV4-30-2</i> | Control        | 0.8%                             | WA1-infected   | 0.0%                             | 0.010            |
| <i>IGKV1-27</i>   | Control        | 3.4%                             | Gamma-infected | 0.0%                             | 0.040            |
| <i>IGKV1-27</i>   | Control        | 3.4%                             | WA1-infected   | 0.0%                             | 0.023            |
| <i>IGLV1-44</i>   | Control        | 7.5%                             | WA1-infected   | 1.3%                             | 0.048            |
| <i>IGLV1-44</i>   | Beta-infected  | 6.3%                             | WA1-infected   | 1.3%                             | 0.035            |
| <i>IGLV1-44</i>   | Gamma-infected | 14.3%                            | WA1-infected   | 1.3%                             | 0.017            |
| <i>IGLV1-47</i>   | WA1-infected   | 8.5%                             | Beta-infected  | 5.5%                             | 0.027            |
| <i>IGLV1-47</i>   | WA1-infected   | 8.5%                             | Control        | 5.4%                             | 0.041            |

**Supplementary Table 3:** Significant differences in gene-usage. For genes with a significant difference detected by the Kruskal-Wallis test (Fig. 3C and Supplementary Fig. 6), the Dunn test was used to find significant pairwise difference. P values were adjusted for multiple testing using the Benjami-Hochberg procedure. Note that *IGKV1-6* is significant in the Kruskal-Wallis test (Supplementary Fig. 6A), but none of the pairwise comparisons remain significant after correction for multiple testing.

| Experiment                                               | Marker                        | Fluorochrome | Clone        | Supplier               | Catalog number | Lot number | Dilution |
|----------------------------------------------------------|-------------------------------|--------------|--------------|------------------------|----------------|------------|----------|
| <b>B cell repertoire sort by 10X</b>                     | IgG                           | FITC         | G18-145      | Miltenyi               | 130-114-001    | 1013930    | 1:40     |
|                                                          | IgA                           | FITC         | IS11-8E10    | BD Biosciences         | 555786         | 5220201557 | 1:100    |
|                                                          | CD8                           | BV510        | RPA-T8       | Biolegend              | 301048         | B303954    | 1:333    |
|                                                          | CD56                          | BV510        | HCD56        | Biolegend              | 318340         | B318848    | 1:160    |
|                                                          | CD14                          | BV510        | M5E2         | Biolegend              | 301842         | B26341     | 1:100    |
|                                                          | CD16                          | BUV496       | 3G8          | BD Biosciences         | 612944         | 288806     | 1:200    |
|                                                          | CD20                          | BUV805       | 2H7          | BD Biosciences         | 564917         | 1085565    | 1:40     |
|                                                          | IgM                           | CF594PE      | G20-127      | BD Biosciences         | 562539         | 2046723    | 1:77     |
|                                                          | CD19                          | PC7          | J3-119       | Beckman Coulter        | IM3628U        | 200152     | 1:77     |
|                                                          | CD3                           | APCCy7       | SP34-2       | BD Biosciences         | 557757         | 1152687    | 1:50     |
| LIVE/DEAD Fixable Blue Dead Cell Stain                   |                               |              | ThermoFisher | L23105                 | 2438350        | 1:200      |          |
| <b>RATP-Ig sort</b>                                      | IgG                           | FITC         | G18-145      | Miltenyi               | 130-114-001    | 1013930    | 1:40     |
|                                                          | IgA                           | FITC         | IS11-8E10    | BD Biosciences         | 555786         | 5220201557 | 1:100    |
|                                                          | CD8                           | BV510        | RPA-T8       | Biolegend              | 301048         | B303954    | 1:333    |
|                                                          | CD56                          | BV510        | HCD56        | Biolegend              | 318340         | B318848    | 1:160    |
|                                                          | CD14                          | BV510        | M5E2         | Biolegend              | 301842         | B26341     | 1:100    |
|                                                          | CD3                           | BV510        | OKT3         | Biolegend              | 317332         | B333939    | 1:100    |
|                                                          | CD16                          | BUV496       | 3G8          | BD Biosciences         | 612944         | 288806     | 1:200    |
|                                                          | CD20                          | BUV805       | 2H7          | BD Biosciences         | 564917         | 1085565    | 1:40     |
|                                                          | IgM                           | CF594PE      | G20-127      | BD Biosciences         | 562539         | 2046723    | 1:77     |
|                                                          | CD19                          | PC7          | J3-119       | Beckman Coulter        | IM3628U        | 200152     | 1:77     |
| LIVE/DEAD Fixable Blue Dead Cell Stain                   |                               |              | ThermoFisher | L23105                 | 2438350        | 1:200      |          |
| <b>Intracellular Cytokine Stain for T cell responses</b> | CD19                          | PE-Cy5       | HIB19        | BD Biosciences         | 302210         | B263542    | 1:80     |
|                                                          | CD14                          | BB660        | M0P9         | BD Biosciences         | 624925         | 0118717    | 1:80     |
|                                                          | CD3                           | BUV395       | UCHT1        | BD Biosciences         | 563546         | 9303095    | 1:80     |
|                                                          | CD4                           | BV480        | SK3          | BD Biosciences         | 566104         | 0058964    | 1:40     |
|                                                          | CD8a                          | BUV805       | SK1          | BD Biosciences         | 612889         | 0126959    | 1:20     |
|                                                          | CD45RA                        | BUV496       | H100         | BD Biosciences         | 750258         | 0118022    | 1:80     |
|                                                          | CD154                         | PE           | TRAP1        | BD Biosciences         | 555700         | 0057282    | 1:10     |
|                                                          | IFN $\gamma$                  | V450         | B27          | BD Biosciences         | 560371         | 9274224    | 1:40     |
|                                                          | IL-2                          | BB700        | MQ1-17H12    | BD Biosciences         | 566404         | 0107814    | 1:161    |
|                                                          | CD16                          | BV570        | 3G8          | Biolegend              | 302036         | B292881    | 1:40     |
|                                                          | CD56                          | BV750        | 5.1H11       | Biolegend              | 362556         | B299053    | 1:40     |
|                                                          | CCR7                          | BV605        | G043H7       | Biolegend              | 353244         | B322424    | 1:10     |
|                                                          | CD69                          | APC-Fire750  | FN50         | Biolegend              | 310946         | B268535    | 1:40     |
| TNF                                                      | FITC                          | Mab11        | Biolegend    | 11-7349-82             | 2298077        | 1:161      |          |
| LIVE/DEAD Fixable Blue Dead Cell Stain                   |                               |              | Invitrogen   | L34962                 | 2176884        | 1:200      |          |
| <b>ELISA for mAb screening</b>                           | HRP-conjugated anti-human IgG |              | Polyclonal   | Jackson ImmunoResearch | 109-035-098    | 154823     | 1:10,000 |
|                                                          | Anti-human IgG Fc             |              | Polyclonal   | Rockland               | 609-1103       | 35325      | 1:20,000 |

**Supplementary Table 4: Antibodies information.**
